# Supplementary material for: Superhydrophobic-like tunable droplet bouncing on slippery liquid interfaces
Source: PubMed Central journal article supplement (PMC4918357; doi:10.1038/ncomms8986), 2015-08-07
Supplement: ncomms8986-s1.pdf [file ncomms8986-s1.pdf]

## Supplementary Figures

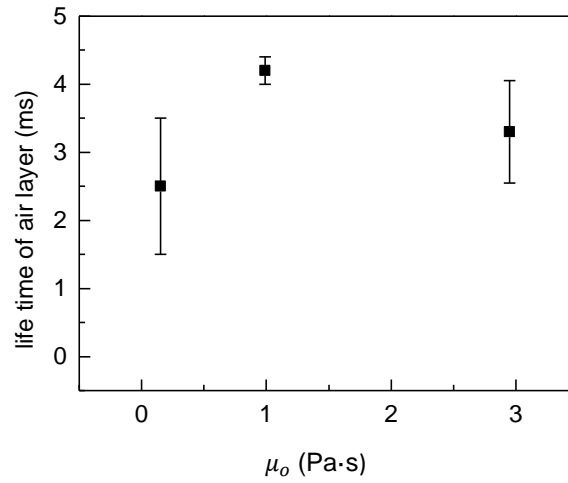

**Supplementary Figure 1** | The variation of the life time of thin air layer on liquid substrates of different viscosity. The thickness of the liquid substrate is  $h=50 \mu\text{m}$  and the Weber number is  $We = 20$ .

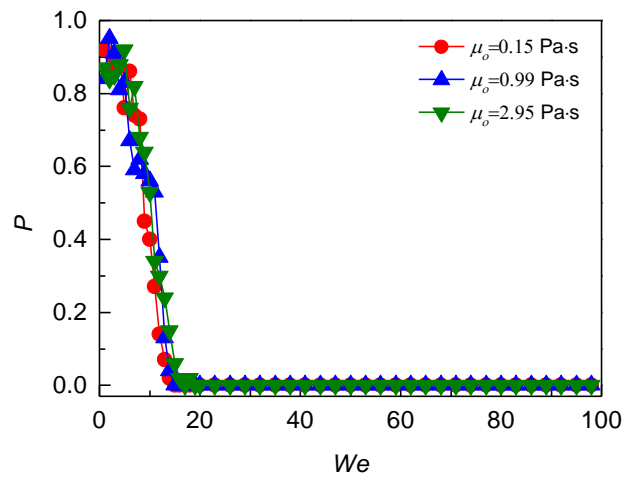

**Supplementary Figure 2** | The probability ( $P$ ) of sustaining an intact thin air cushion on pure oil bath under different  $We$ . For  $We \lesssim 10$ , the percentage of achieving complete rebound with an integral air layer entrapment is 75% ~ 90%, whereas it drops sharply to nearly zero for  $We \gtrsim 18$ . Moreover, the oil viscosity has no apparent effect on the probability of sustaining an intact thin air cushion.

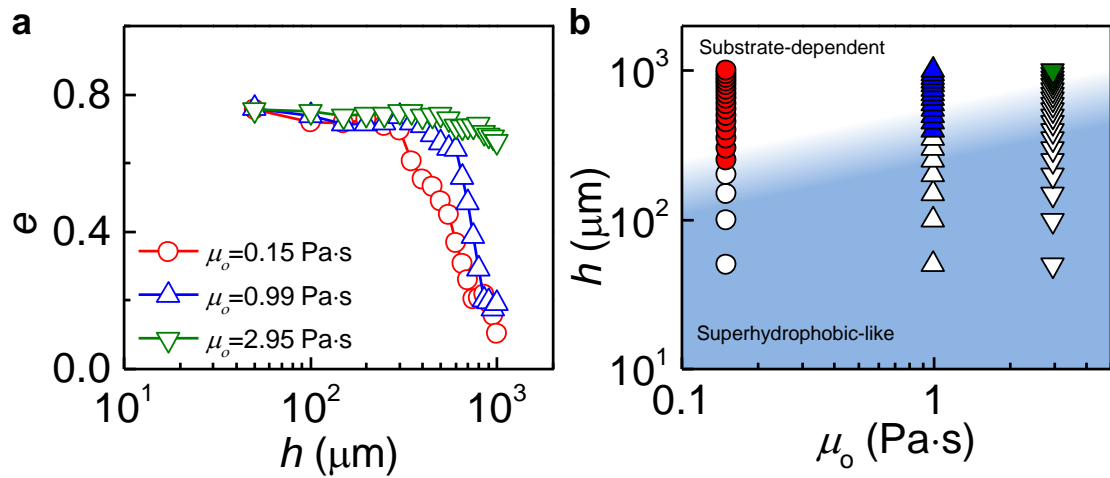

**Supplementary Figure 3** | (a) The variation of the restitution coefficient  $e$  as a function of oil thickness  $h$  for oil films with viscosity of 0.15 Pa·s, 0.99 Pa·s and 2.95 Pa·s, respectively. The  $We$  is 2.0. (b) The dependence of superhydrophobic-like bouncing (open symbols) and substrate-dependent bouncing (solid symbols) on  $h$  and  $\mu_o$ . In the superhydrophobic-like bouncing regime, the effect of liquid substrate on the bouncing is negligible whereas  $e$  is greatly affected by the oil film in the substrate-dependent regime.
